# Supplementary material
Source: Springer Nature journal article supplement (https://www.springermedizin.de/resource/supplementary/12911_2013_794_MOESM1_ESM.pdf/9526654)
Supplement: MOESM1 [file 9526654]

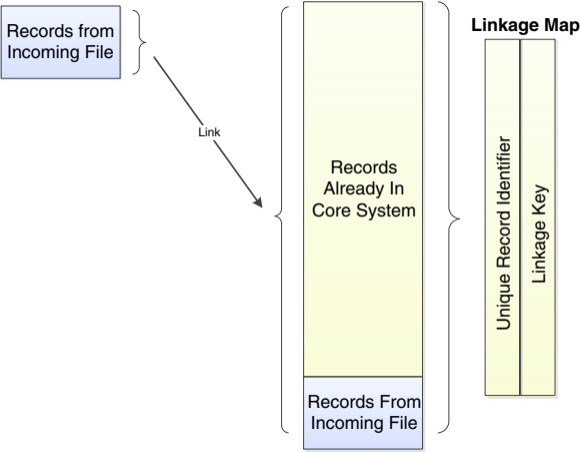

Records from Incoming File

Link

Records Already In Core System

Records From Incoming File

Linkage Map

Unique Record Identifier

Linkage Key
